# Supplementary material for: The interaction of genetic determinants in the outcome of HCV infection: evidence for discrete immunological pathways
Source: PubMed Central journal article supplement (PMC4858811; doi:10.1111/tan.12650), 2015-09-18
Supplement: TAN-86-267-s001.pdf [file TAN-86-267-s001.pdf]

**Table 1.** Univariate analysis of single nuclear polymorphisms leading to spontaneous resolution

| Genetic Factor      | Genotype                   | Univariate logistic regression |                  |
|---------------------|----------------------------|--------------------------------|------------------|
|                     |                            | P-value                        | OR (95% CI)      |
| IFN-λ3/4 rs12979860 | CC                         | 0.027                          | 1.92 (1.08-3.44) |
| KIR:HLA             | 2DL3:HLA-C1C1              | 0.027                          | 1.96 (1.08-3.56) |
|                     | 2DS3                       | 0.015                          | 0.36 (0.15-0.82) |
|                     | 2DS5                       | 0.026                          | 0.45 (0.22-0.91) |
|                     | HLA-DRB1*04:01             | 0.014                          | 2.88 (1.24-6.70) |
| Tapasin & HLA       | TapG:HLA-B <sup>114D</sup> | 0.007                          | 2.57 (1.30-5.08) |
