# Supplementary material for: The interaction of genetic determinants in the outcome of HCV infection: evidence for discrete immunological pathways
Source: PubMed Central journal article supplement (PMC4858811; doi:10.1111/tan.12650), 2015-09-18
Supplement: TAN-86-267-s002.pdf [file TAN-86-267-s002.pdf]

**Table 2.** Univariate analysis of single nuclear polymorphisms leading to a sustained virological response

|               | Genotype                         | Univariate analysis |                   |
|---------------|----------------------------------|---------------------|-------------------|
|               |                                  | P-value             | OR (95% CI)       |
| All Genotypes | IFN- $\lambda$ 3/4 rs12979860 CC | 0.044               | 1.94 (1.02-3.71)  |
|               | KIR3DS1:HLA-Bw4 <sup>801</sup>   | 0.029               | 4.17 (1.16-15.08) |
|               | KIR2DL2/S2:HLA-C1C1              | 0.014               | 0.36 (0.16-0.81)  |
|               | KIR2DL2                          | 0.048               | 0.54 (0.30-0.99)  |
| HCV G1        | IFN- $\lambda$ 3/4 rs12979860 CC | 0.024               | 3.07 (1.16-8.14)  |
|               | CA01CA01                         | 0.041               | 2.74 (1.04-7.20)  |
| HCV G2/3      | KIR2DL3:HLA-C1                   | 0.038               | 3.33 (1.07-10.39) |
|               | CB01                             | 0.051               | 0.33 (0.11-1.01)  |
