# Supplementary material for: The interaction of genetic determinants in the outcome of HCV infection: evidence for discrete immunological pathways
Source: PubMed Central journal article supplement (PMC4858811; doi:10.1111/tan.12650), 2015-09-18
Supplement: TAN-86-267-s003.pdf [file TAN-86-267-s003.pdf]

**Table 3.** Genetic data available for high resolution KIR typing and treatment related outcomes presented according to haplotype (n=185)

|                    | KIR Copy No | All patients n = 185 | All SVR n (%)    | G1 n = 91 | G1 SVR n (%)     | G2/3 n = 94 | G2/3 SVR n (%)   |
|--------------------|-------------|----------------------|------------------|-----------|------------------|-------------|------------------|
| <b>Haplotype A</b> |             |                      |                  |           |                  |             |                  |
| <b>CA01</b>        |             | <b>155</b>           | <b>83 (55.7)</b> | <b>76</b> | <b>28 (37.8)</b> | <b>79</b>   | <b>55 (73.3)</b> |
| KIR2DL1            | 0           | 4                    | 1 (25)           | 2         | 1 (50)           | 2           | 0 (0)            |
|                    | 1           | 55                   | 28 (50.9)        | 24        | 6 (25)           | 31          | 22 (71)          |
|                    | 2           | 112                  | 66 (58.9)        | 58        | 28 (48.3)        | 54          | 38 (70.4)        |
|                    | 3           | 3                    | 2 (66.7)         | 1         | 0 (0)            | 2           | 2 (100)          |
|                    | 4           | 1                    | 1 (100)          | 0         | 0 (0)            | 1           | 1 (100)          |
| KIR2DL3            | 0           | 11                   | 6 (54.5)         | 5         | 4 (80)           | 6           | 2 (33.3)         |
|                    | 1           | 85                   | 43 (50.6)        | 42        | 12 (28.6)        | 43          | 31 (72.1)        |
|                    | 2           | 77                   | 48 (62.3)        | 37        | 18 (48.6)        | 40          | 30 (75)          |
| KIR 2DP1           | 0           | 3                    | 1 (33.3)         | 2         | 1 (50)           | 1           | 0 (0)            |
|                    | 1           | 54                   | 27 (50)          | 23        | 6 (26.1)         | 31          | 21 (67.7)        |
|                    | 2           | 115                  | 68 (59.1)        | 59        | 28 (47.5)        | 56          | 40 (71.4)        |
|                    | 3           | 3                    | 2 (66.7)         | 1         | 0 (0)            | 2           | 2 (100)          |
| <b>TA01</b>        |             | <b>156</b>           | <b>83 (54.6)</b> | <b>76</b> | <b>29 (39.2)</b> | <b>80</b>   | <b>54 (69.2)</b> |
| KIR 3DL1           | 0           | 10                   | 7 (70)           | 5         | 2 (40)           | 5           | 5 (100)          |
|                    | 1           | 58                   | 35 (60.3)        | 24        | 12 (50)          | 34          | 23 (67.6)        |
|                    | 2           | 106                  | 55 (51.9)        | 55        | 20 (36.4)        | 51          | 35 (68.6)        |
|                    | 3           | 1                    | 1 (100)          | 1         | 1 (100)          | 0           | 0 (0)            |
| KIR 2DS4           | 0           | 10                   | 7 (70)           | 5         | 2 (40)           | 5           | 5 (100)          |
|                    | 1           | 59                   | 35 (59.3)        | 25        | 12 (48)          | 34          | 23 (67.6)        |
|                    | 2           | 106                  | 56 (52.8)        | 55        | 21 (38.2)        | 51          | 35 (68.6)        |
| <b>Haplotype B</b> |             |                      |                  |           |                  |             |                  |
| <b>CB01</b>        |             | <b>147</b>           | <b>16 (44.4)</b> | <b>73</b> | <b>7 (38.9)</b>  | <b>74</b>   | <b>9 (50)</b>    |
| KIR2DL2            | 0           | 83                   | 53 (63.9)        | 38        | 19 (50)          | 45          | 34 (75.6)        |
|                    | 1           | 82                   | 40 (48.8)        | 43        | 13 (30.2)        | 39          | 27 (69.2)        |
|                    | 2           | 10                   | 5 (50)           | 4         | 3 (75)           | 6           | 2 (33.3)         |
| KIR 2DL5           | 0           | 89                   | 49 (55.1)        | 44        | 17 (38.6)        | 45          | 32 (71.1)        |
|                    | 1           | 58                   | 31 (53.4)        | 29        | 11 (37.9)        | 29          | 20 (69.0)        |
|                    | 2           | 22                   | 15 (68.2)        | 8         | 6 (75)           | 14          | 9 (64.3)         |
|                    | 3           | 5                    | 2 (40)           | 3         | 0 (0)            | 2           | 2 (100)          |
|                    | 4           | 1                    | 1 (100)          | 1         | 1 (100)          | 0           | 0 (0)            |
| KIR 2DS2           | 0           | 81                   | 51 (63)          | 38        | 19 (50)          | 43          | 32 (74.4)        |
|                    | 1           | 85                   | 42 (49.4)        | 43        | 13 (30.2)        | 42          | 29 (69)          |
|                    | 2           | 9                    | 5 (55.6)         | 4         | 3 (75)           | 5           | 2 (40)           |
| KIR 2DS3           | 0           | 128                  | 76 (59.4)        | 59        | 25 (42.4)        | 69          | 51 (73.9)        |
|                    | 1           | 35                   | 13 (37.1)        | 19        | 5 (26.3)         | 16          | 8 (50)           |
|                    | 2           | 10                   | 8 (80)           | 5         | 4 (80)           | 5           | 4 (80)           |
|                    | 3           | 2                    | 1 (50)           | 2         | 1 (50)           | 0           | 0 (0)            |
| <b>TB01</b>        |             | <b>150</b>           | <b>32 (58.2)</b> | <b>75</b> | <b>10 (41.7)</b> | <b>75</b>   | <b>22 (71)</b>   |
| KIR 2DS1           | 0           | 108                  | 57 (52.8)        | 56        | 21 (37.5)        | 52          | 36 (69.2)        |
|                    | 1           | 57                   | 34 (59.6)        | 24        | 12 (50)          | 33          | 22 (66.7)        |
|                    | 2           | 10                   | 7 (70)           | 5         | 2 (40)           | 5           | 5 (100)          |
| KIR 2DS5           | 0           | 122                  | 64 (52.5)        | 64        | 25 (39.1)        | 58          | 39 (67.2)        |

|                  |   |     |           |    |           |    |           |
|------------------|---|-----|-----------|----|-----------|----|-----------|
|                  | 1 | 48  | 30 (62.5) | 19 | 9 (47.4)  | 29 | 21 (72.4) |
|                  | 2 | 5   | 4 (80)    | 2  | 1 (50)    | 3  | 3 (100)   |
| KIR 3DS1         | 0 | 109 | 56 (51.4) | 57 | 21 (36.8) | 52 | 35 (67.3) |
|                  | 1 | 55  | 35 (63.6) | 23 | 13 (56.5) | 32 | 2 (68.8)  |
|                  | 2 | 8   | 5 (62.5)  | 3  | 0 (0)     | 5  | 5 (100)   |
|                  | 3 | 3   | 2 (66.7)  | 2  | 1 (50)    | 1  | 1 (100)   |
| <b>Framework</b> |   |     |           |    |           |    |           |
| KIR 2DL4         | 0 | 5   | 2 (40)    | 2  | 1 (50)    | 3  | 1 (33.3)  |
|                  | 1 | 161 | 90 (55.9) | 78 | 31 (39.7) | 83 | 59 (71.1) |
|                  | 2 | 8   | 5 (62.5)  | 4  | 2 (50)    | 4  | 3 (75)    |
| KIR 3DL2         | 1 | 7   | 3 (42.9)  | 2  | 0 (0)     | 5  | 3 (60)    |
|                  | 2 | 168 | 95 (56.5) | 83 | 35 (42.2) | 85 | 60 (70.6) |
| KIR 3DL3         | 2 | 175 | 98 (56)   | 85 | 35 (41.2) | 90 | 63 (70)   |
| KIR 3DP1         | 1 | 4   | 1 (25)    | 2  | 1 (50)    | 2  | 0 (0)     |
|                  | 2 | 164 | 93 (56.7) | 80 | 33 (41.3) | 84 | 60 (71.4) |
|                  | 3 | 7   | 4 (57.1)  | 3  | 1 (33.3)  | 4  | 3 (75)    |
